# Supplementary material for: PCL/Starch/Agar Coatings for Food-Packaging Paper: Statistical Correlation of the Formulations’ Effect on Diffusion Mechanism and Resistance to Grease, and Tensile Stress
Source: Preprints.org preprint supplement (doi:10.20944/preprints202308.0911.v1), 2023-08-11
Supplement: Supplementary file 2 [file supplementary]

**Supplementary Materials**

**Table S1.** Results of the Multifactorial ANOVA and Tukey's HD test regarding grammage and thickness. Results are reported as F-values and lowercase letters (“c” > “b” > “a”), respectively. Different letters identify significantly different samples.


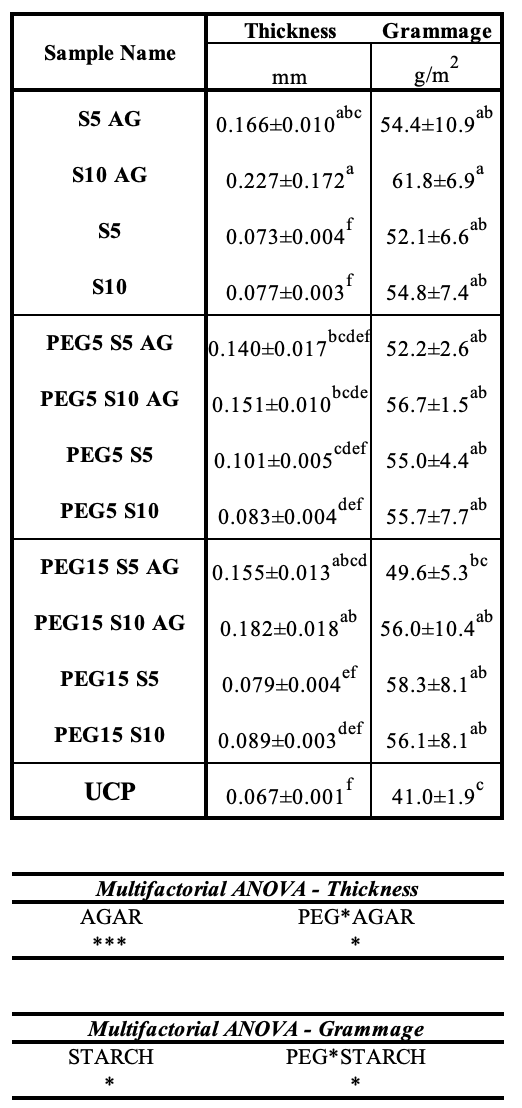


**Table S2**. Results of the Multifactorial ANOVA and Tukey's HD test regarding CA Oil. Results are reported as F-values and lowercase letters (“c” > “b” > “a”), respectively. Different letters identify significantly different samples.


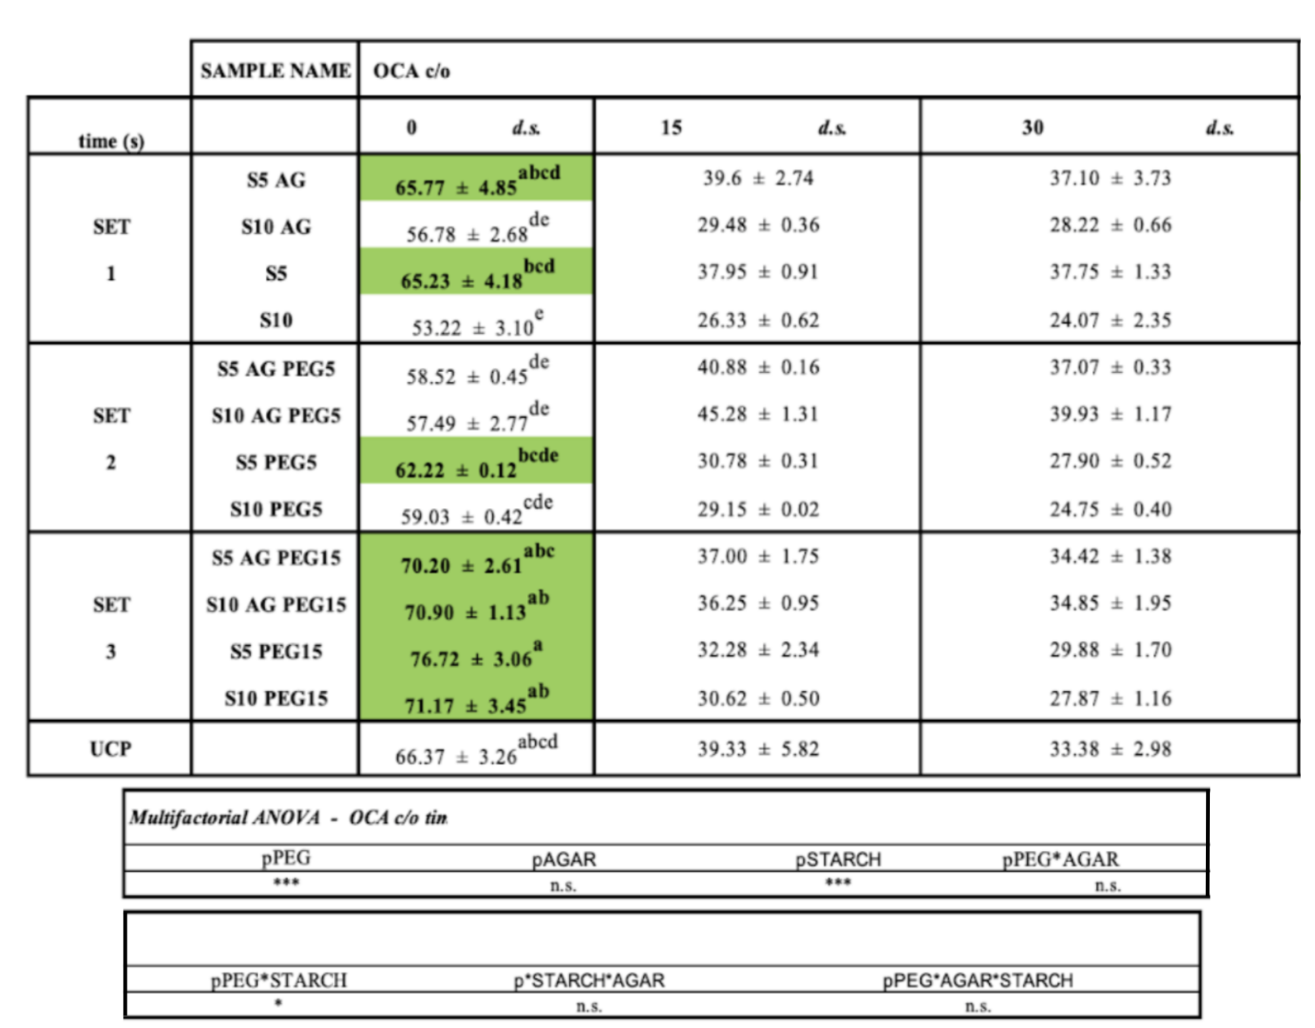


**Table S3**. Results of the Multifactorial ANOVA and Tukey's HD test regarding KIT12. Results are reported as F-values and lowercase letters (“c” > “b” > “a”), respectively. Different letters identify significantly different samples.


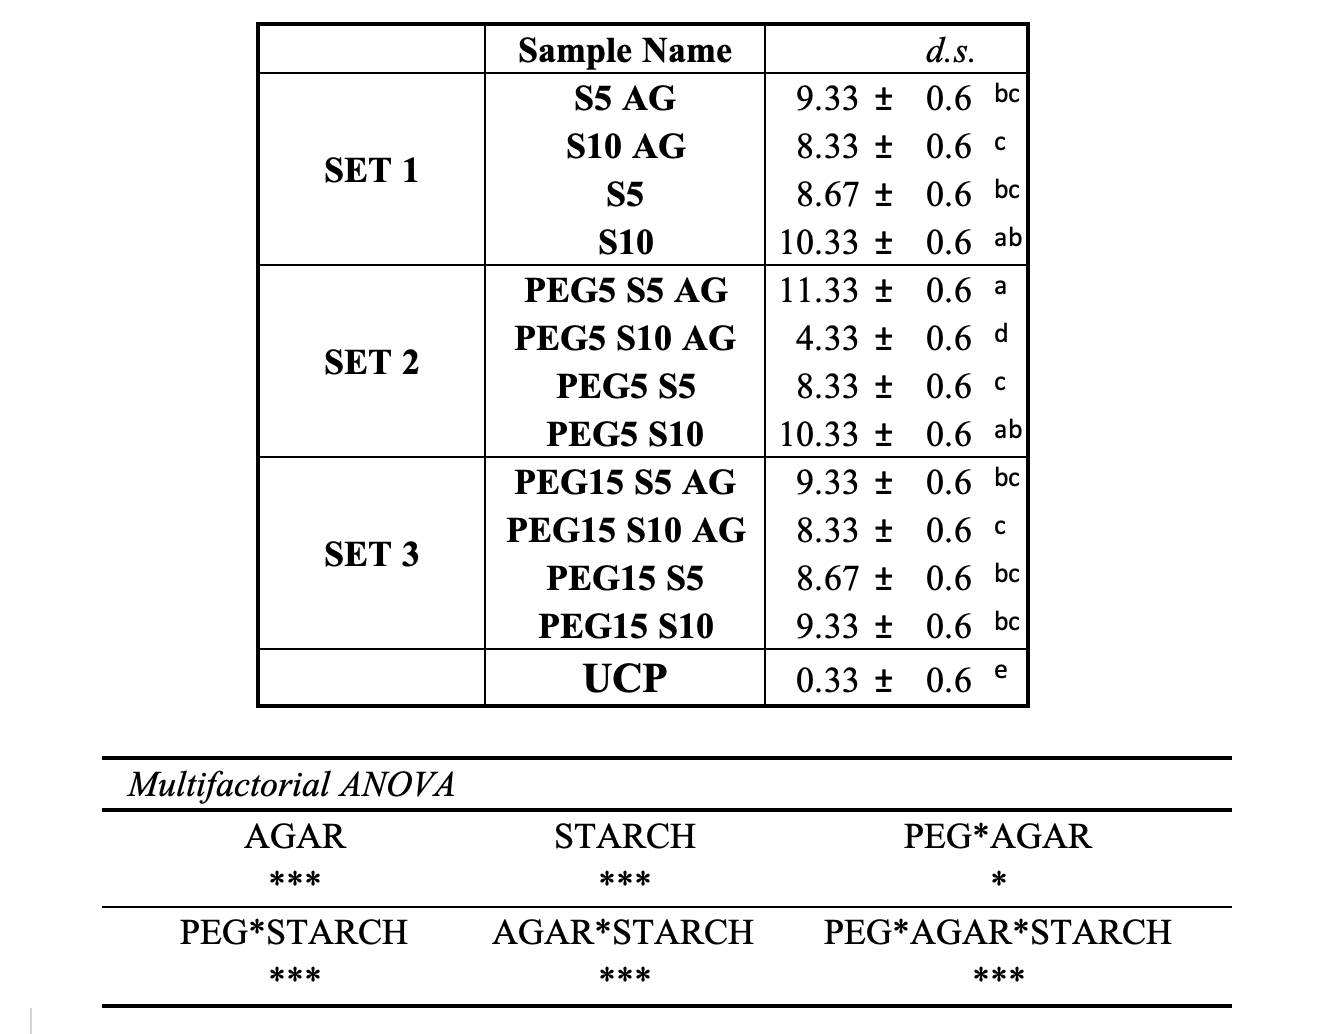


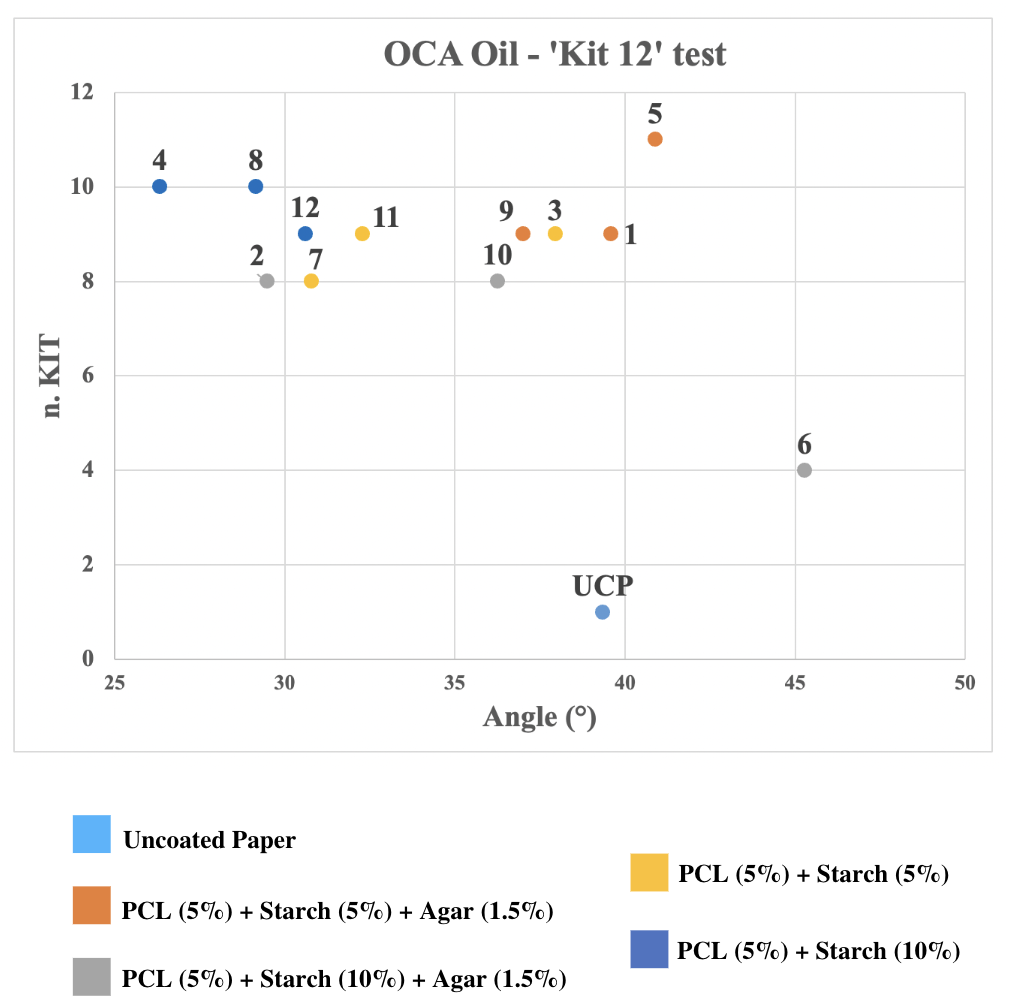


**Figure S1**. Numerical results of the KIT 12 test


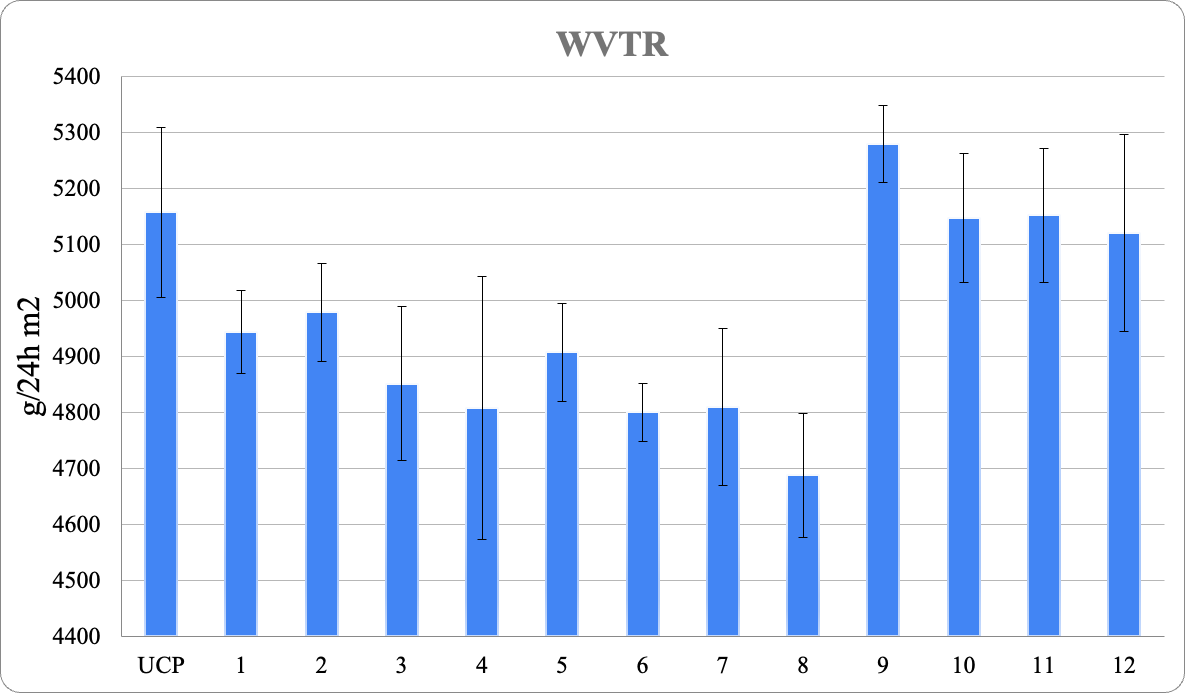


**Figure S2.** Numerical results of the WVTR

**Table S4.** Results of the Multifactorial ANOVA and Tukey's HD test regarding WVTR. Results are reported as F-values and lowercase letters (“c” > “b” > “a”), respectively. Different letters identify significantly different samples.


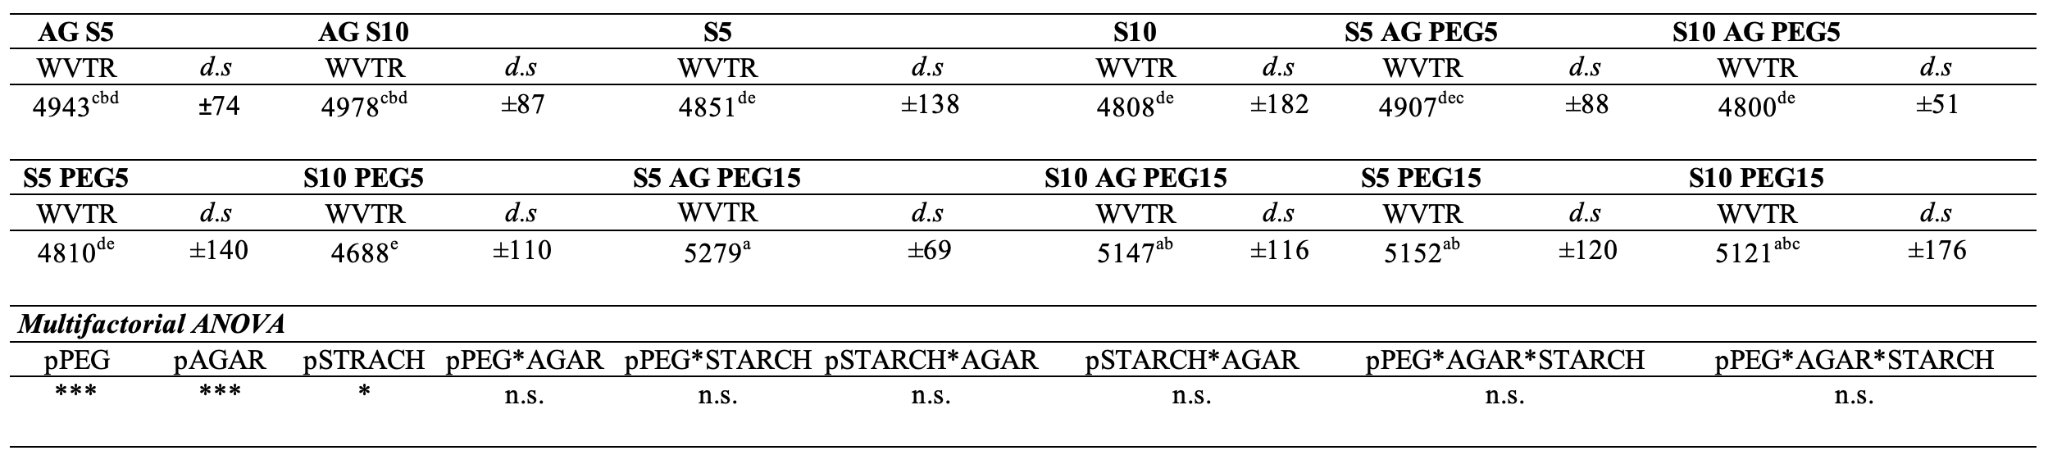


**Table S5.** Results of the Multifactorial ANOVA and Tukey's HD test regarding CA Water. Results are reported as F-values and lowercase letters (“c” > “b” > “a”), respectively. Different letters identify significantly different samples.


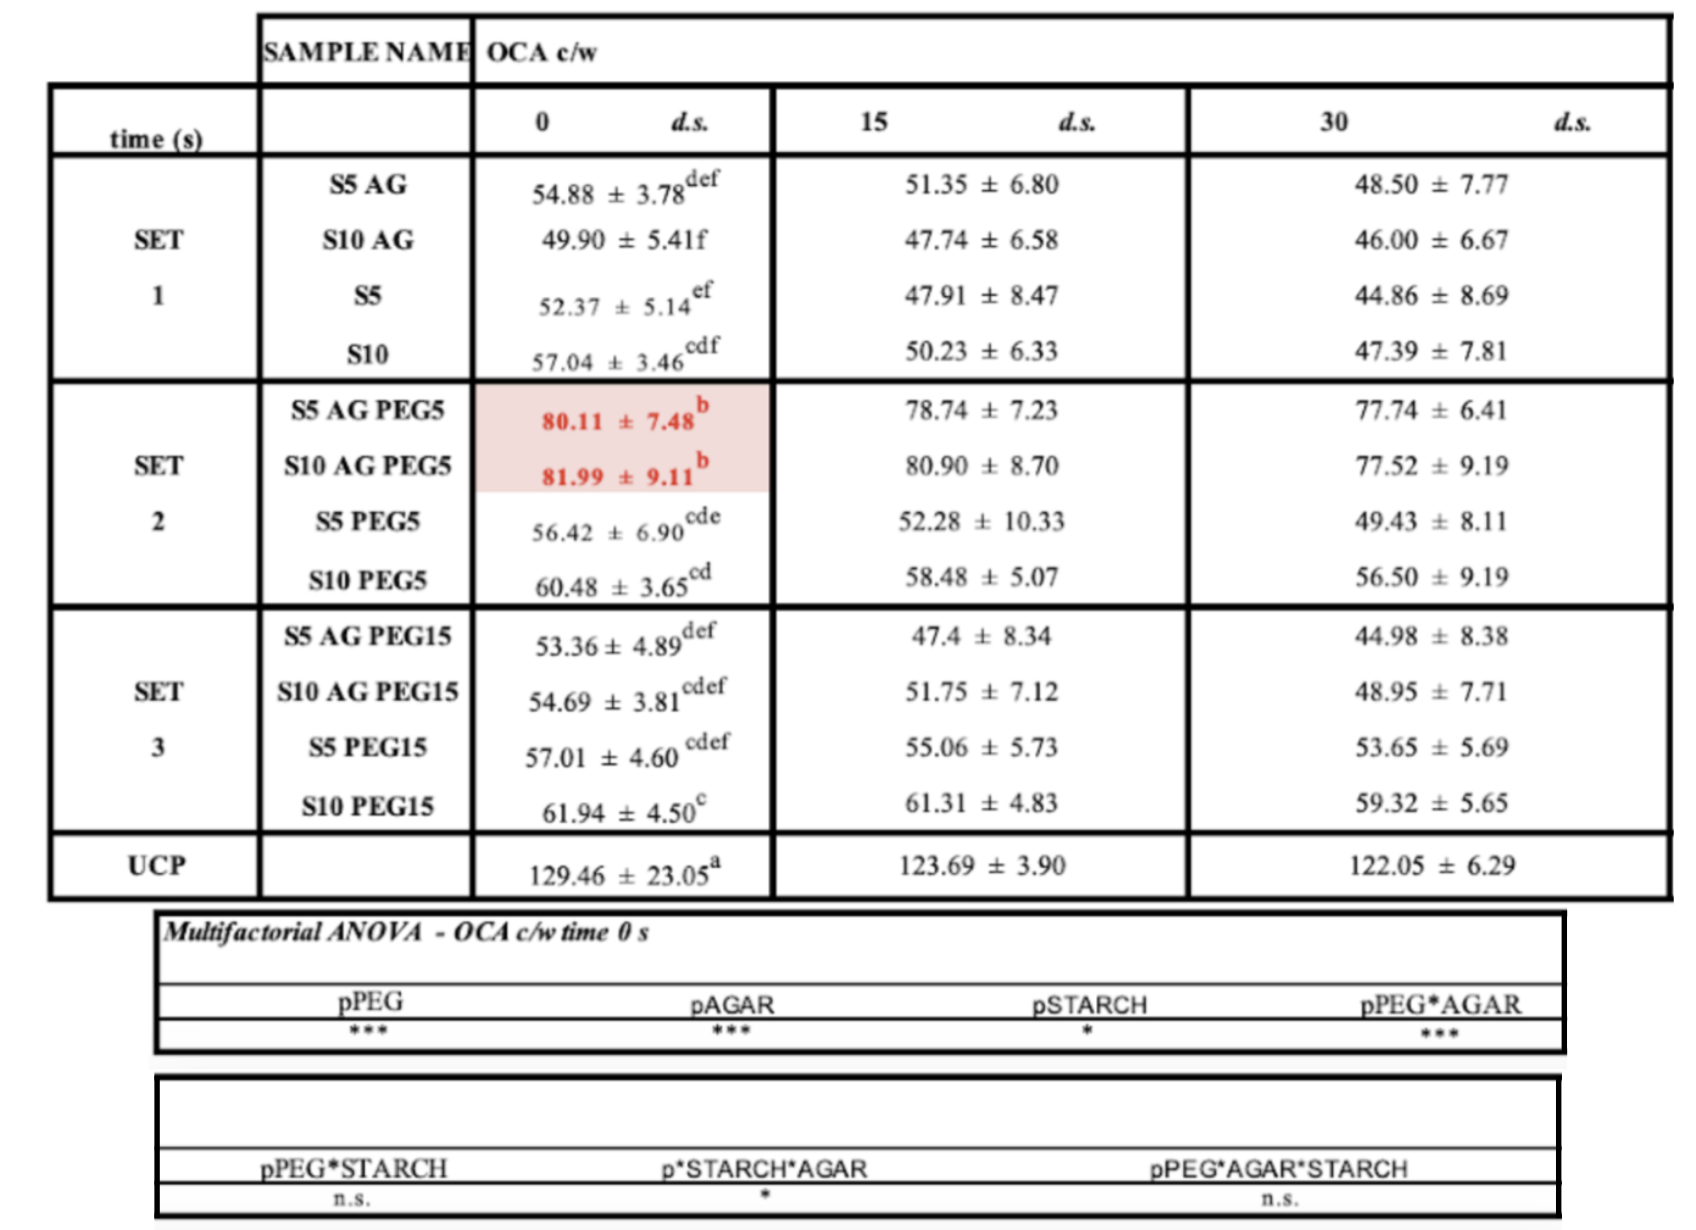


**Table S6.** Results of the Multifactorial ANOVA and Tukey's HD test regarding Mechanical properties. Results are reported as F-values and lowercase letters (“c” > “b” > “a”), respectively. Different letters identify significantly different samples.


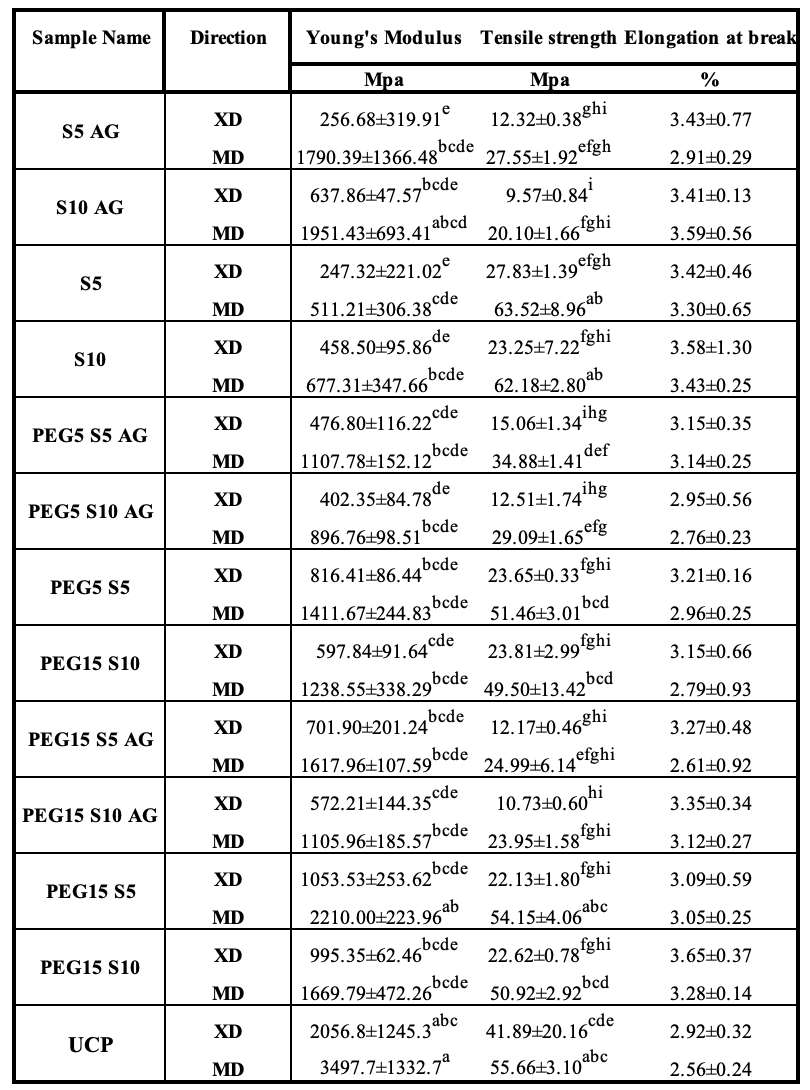


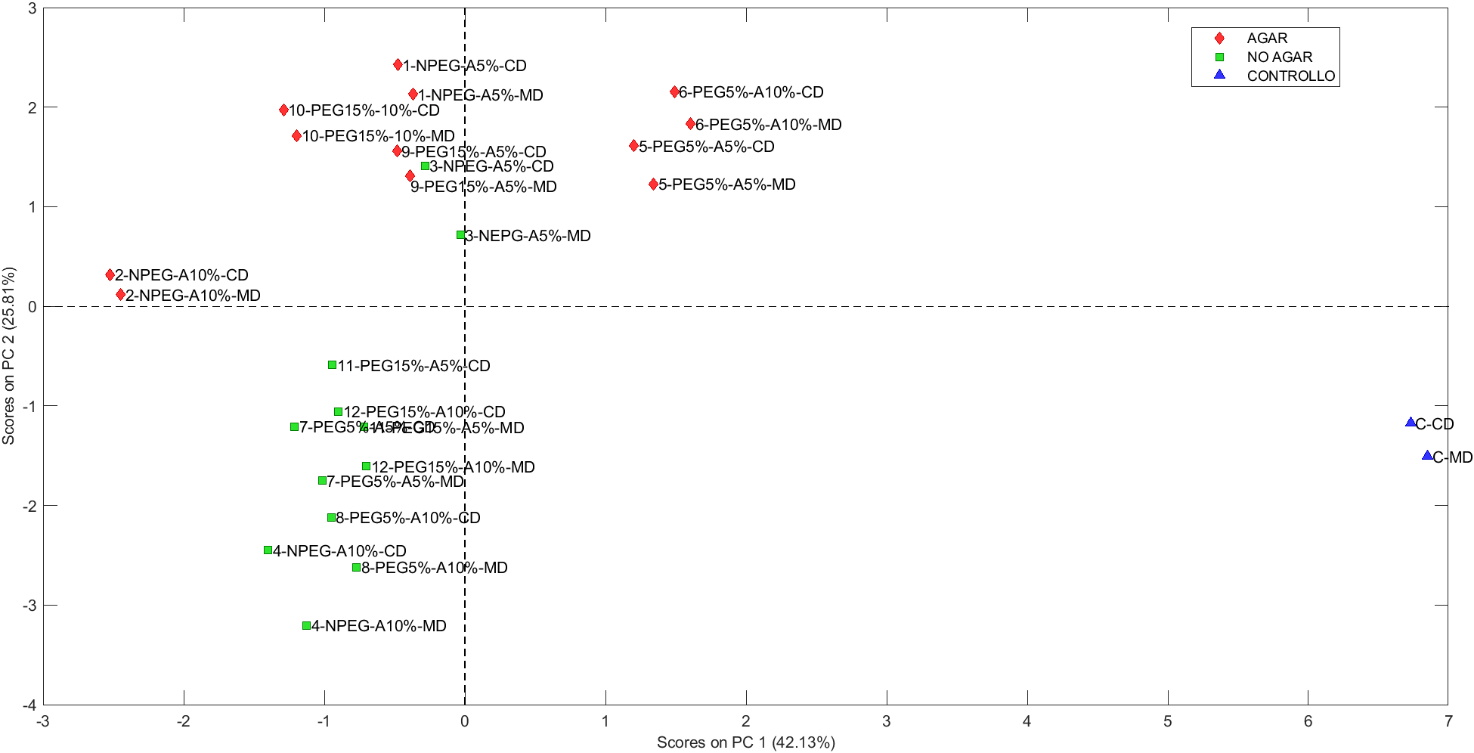


**Figure S3**. Scores of the PCA analysis
